# Supplementary material for: An Overview of the Immune Response to COVID-19 Vaccination and Strategies to Boost SARS-CoV-2 Immunity in People with Inborn Errors of Immunity
Source: Preprints.org preprint supplement (doi:10.20944/preprints202405.0661.v1), 2024-05-10
Supplement: Supplementary file 1 [file supplementary]

## Sheet: Key - Abbreviations Used 
Abbrievation	Meaning/Definition
PADs	Primary antibody deficiencies
CVID	Common variable immunodeficiency
Anti-S, Anti-RBD	Anti-spike, anti-receptor binding domain
HC/HV	Healthy controls or healthy volunteers
mAb therapy	Monoclonal antibody therapy
IEI	Inborn error of immunity
TSP	Trimeric spike protein
NC	Neutralization capacity
IC	Immunocompromised
MCAb	Monoclonal antibody
IGRA	Interferon Gamma(y) Release Assay
AIMS	activation induced markers
BCD	B-cell defect(s)
ABC	Age-associated B cells

## Sheet: Table S1 Antibody Responses
Lead author	Year published	DOI	Country	Summary & Important Findings	Type of IEI	Gene Defect	Vaccine formulations	No. of patients	Seroconversion definition - which subunit?	Seroconversion	Seroconversion Method	Neutralizing capacity	Neutralizing Capacity Method	Variants?	Supplement Links or Additional Notes
Abella, E.	2022	10.26508/lsa.202201479	Spain	Study evaluating plasma samples from patients with plasma-cell disease for humoral immune response 3 months after the SC2 vax. Found that MM hybrid immunity = higher plasma neutralization capacity compared to infection-naive. Positive correlation between antibody production and neutralization response. Negative correlation between neutralizing capacity and days post-vax; higher age.	Monocloncal gammopathies	MGUS, SMM, MM	mRNA only	n=59	Both (S2+S1/RBD)	All seroconverted; statistically significant differences among subgroups in antibody levels	in house sandwich ELISA	100% seroconverted, differences in levels. MM showed lower capacity compared to CG. Subgroups: 7/10 MM did not reach threshold	Pseudovirus neutralization assy	No	Found higher neutralization capacity in MM patients who had recovered from CV19 + vaxxed compared to just vaxxed
Abo-Helo, N.	2022	10.1016/j.anai.2022.03.035	Israel	Observational study of 15 pts with CVID, divided into 3 subgroups based on B cell level/EUROclass classification, and their response to a 3rd Pfizer vax dose. Also observed protective antibody levels in 3 subgroups 5-6 mos after 2nd dose. Suggestion: consider booster for CVID pts before 5mos after vax2.	PAD	CVID	BNT162b2 mRNA (Pfizer)	n=15	Spike	0.75	Abbott IgG assay	NA	NA	No
Abo-Helo, N.	2021	10.1016/j.anai.2021.07.021	Israel	Retrospective observational study of humoral response in CVID pts after 2 dose vax regimen; found correlation with subgroups and immune response.	PAD	CVID	BNT162b2 mRNA (Pfizer)	n=15	Spike	0.733	Abbott IgG assay	NA	NA	No
Ameratunga, R.	2021	10.3389/fimmu.2021.798389	New Zealand	Review paper of research on patients at high risk for SC2, including immunodeficiency disorders. CVID = model for PID and vax challenges in IC pts. Observes relationship between T cells, responses to vax and patient outcomes. Recommend: individual assessment for degree of cellular immunity	PADs	CVID	All current available vaccines	NA	Spike	NA	NA	NA	NA	No	Reccomendation paper, no cohort data on seroconversion or NC. Conclusion: immunocompromised patients should have 3x vax and T cell responses measured. Published two recent studies observing vax respponse in CVID and hypogammaglobulinemia.
Amodio, D.	2021	10.3389/fimmu.2021.727850	Italy	Observational longitudinal study of patients with different IEIs for humoral and cellular response after SC2 primary series, with HC. Samples were collected at pre-determined time points. Both groups showed increase in antibodies after vax; variable T cell response.	Mixed	CVID, unPAD, XLA, WHIM-like disorder	BNT162b2 mRNA (Pfizer)	21 (CVID = 14, unPAD = 5, XLA = 1, WHIM-like disorder = 1)	RBD/Trimeric	100% IEI and HC had increase in antibody levels between D21 and D28/dose 1 and 2. IEI patients had lower median specific antibody levels.	Roche Elecsys immunoassay, DiaSorin immunoassay	NA	NA	No	Also longitudinal blood samples. D0 = day of vax, D21 = 21 days after vax1, D28 = 28 days after vax2
Antoli, A.	2022	10.3389/fimmu.2022.895209	Spain-- Catalonia	Prospective study assessing humoral and cellular immune response to SC2 vax and factors that predict poor response in CVID, BCDT patients, and overall vax safety. Impaired response in CVID, BCDT presented with humoral failure. Poor memB cell count correlated with poor antibody response.	PADs	CVID (+ LRBA, IKAROS, Good syndrome)	mRNA, mixed	CVID group = 28, BCD group = 24	Both (Subunit 1/RBD + Subunit 2)	71% (CVID), 46% in BCD patients	DiaSorin immuoassay	NA	NA	No	Excluded those with previous asymptomatic SC2 infection via IGRA. Despite poor humoral response, 96% of BCD pts had cellular response.
Arroyo-Sanchez, D.	2022	10.1007/s10875-021-01174-5	Spain	Humoral and cellular response to SC2 vaccination primary series in patients with CVID. Measured through peripheral blood samples before + after each dose; compared to HC. CVID responses - both seroconversion and neutralization - were lower compared to healthy controls. Absent or poor response was associated with previous history of autoimmunity/lymphoproliferation.	Predominantly antibody deficiencies	CVID	BNT162b2, mRNA-1273, or ChAdOx1. HC only vaccinated with Pfizer.	n=18	Spike	0.83	ELISA	0.5	ELISA	No
Barmettler, S.	2022	10.1016/j.jaip.2022.03.017	USA	Evaluated antibody response to SC2 vax in PAD patients, identify predicting factors of vax response. Assessed PAD patients 4-6 weeks after full primary series. PAD patients had lower mean antibodies compared to matched HC. Those with secondary PAD, severe PAD had lowest antibodies--also had low T helper, B cells, memory B cells.	PAD	Mixed (CVID, oPADs)	BNT162b2, mRNA-1273, or Ad26.COV2.S (J&J)	n=62, matched healthy controls	Both	59.7% had 100%, mean was 140.1 U/mL. PAD patients with mRNA vaccine had higher titer than J&J vaccine.	Roche Elecsys immunoassay	Significantly lower mean neutralization in severe vs mild PAD patients	Pseudovirus Neutralization assay	No	Found that anti spike Ab levels correlates linearly with pseudovirus neutralization function. 31/62 received 3rd dose, which increased mean antibody levels, similar across risk factors. Looked at passive transfer of antibodies from IgGRT.
Barouch, D. H.	2021	10.1056/NEJMc2108829	USA	8mos durability of cellular and humoral immune response in healthy patients with J&J vax. Evaluated at different time points. Observed expansion of neutralizing antibodies over time.	Healthy Patients	NA	Ad26.COV2.S vaccine (J&J)	n=20	Both: RBD for antibodies, spike for T cells	Detected in all patients. Median binding antibody titer: parental strain = 645	ELISA	Neutralizing antibody titer of 184 against parental strain	Pseudovirus Neutralization assay	Yes: Wuhan, D614G, B.1.1.7, B.1.617.1, B.1.617.2, P.1, B.1.429, B.1.351	Studied durability of humoral and cellular responses, 8mos after vax. But in healthy patients.
Barrios, Y.	2022	10.15586/aei.v50i3.583	Spain	Patients with CVID had humoral and cellular immune response measured after 2 vax doses. Cell response was measured using both in vivo and ex vivo methods. A DTH skin test was used and ultimately suggested as a simple and cheap measure of T cell function. Found correlation + able to validate ex vivo results with DTH.	PADs	CVID	BNT162b2 mRNA (Pfizer)	n=17	Spike	12/17 (71%) after 2nd vax	ELISA	NA	NA	No	Purpose of paper was to compare in-vivo (with DTH skin test) and ex-vivo cellular immune response.
Bergman, P	2022	doi:10.1007/s10875-022-01244-2.	Stockholm, Sweden	Single center cohort study of patients with CVID after SC2 vax, analyzed for antibody and spike specific T cell production. CVID patients' median antibody titers were 83-fold lower than HC. Elevated CD21 B cell counts negatively associated with poor humoral response to vax.	PADs	CVID	BNT162b2 mRNA (Pfizer)	n= 50	Spike	68.3% (28/41, excluding SC2 infections + those seropositive at baseline)	Roche immunoassay	NA	NA	No	CVID patients who had optimal vax responses (<250 U/ml) had fewer comorbidities, autoimmune conditions, and immunosuppressive meds. Authors did not find difference to be statistically significant.
Bergman, P.	2021	10.1016/j.ebiom.2021.103705	Sweden	Open label, non-randomized, prospective clinical trial observing safety and efficacy of SC2 primary series in 5 groups of immunocompromised patients and HC. Rate of seroconversion in IC lower than HC, varied widely among IC patient groups. Lowest found in groups with treatment using mycophenolate mofetil, ibrutinib.	PAD or SAD	Mixed (PAD, SAD = HIV, CAR T cell therapy, SOT, CLL)	BNT162b2 mRNA (Pfizer)	n=539	Both	72.2%, varied by group	Roche Elecsys immunoassay	NA	NA	No
Bitzenhofer, M.	2022	10.1371/journal.pone.0268780	Switzerland	Cross-sectional study evaluating antibody response in HID pts after SC2 primary series. Measurements taken 4 weeks - 4mos after 2nd dose. Lower humoral response in HID compared to HC. Lower antibody levels in those with more severe disease and/or on immunosuppressive drugs.	Primary or Secondary Hypogammaglobulinemia	CVID or other Humoral immunodeficiency (HID): IgG deficiency, IgG subclass deficiency, lymphoproliferative disease	BNT162b2 or mRNA-127 3	n=39	Spike	HID = 66.7%, CVID = 61.5%	Abbott nucleoprotein assay, DiaSorin IgG assay			No	Patients needed to be treated with immunoglobulin replacement therapy to meet study criteria.
Bloomfield, M.	2022	10.1007/s10875-021-01163-8	Czech Republic	Study of seven adult cases of STAT1GOF with SC2 vax and/or infection. 4 patients seroconverted, including 2 individuals on ruxolitinib. 2 had anti-RBD IgA. Most patients had a cellular immune response.	Disorders of immune regulation	STAT1 GOF	BNT162b2 mRNA (Pfizer)	n=7	RBD/S1	4/7 = 57%	Enzyme immunoassay; Microblot Array	NA	NA	No
Delmonte, O.M.	2021	10.1016/j.jaci.2021.08.016	USA	Evaluated impact of IEI genetic diagnosis, age, and treatment on antibody response to SC2 vaccine and related adverse events, using plasma from different points pre/post vaccine. Found that immunogenecity is affected by some therapies and gene defects, and antibody levels after the primary series were significantly lower in the IEI group than health control (HC) group.	Mixed	STAT3, APECED, CVID, hypogammaglobulinemia, WHIM, WAS, GOF, CID, XLA, recurrent autoimmune cytopenias, STAT3 GOF, RAG deficiency with autoimmunity, CD40 ligand deficiency, SASH3, RALD, ADA, MAGT1, FOXN1	mRNA or J&J	Total n = 83, 74 completed immunization schedule	Spike	All IEI: 58.7% after 1 dose, 85.4% after 2 doses	Luciferase immunoprecipitation systems	NA	NA	No	https://www.jacionline.org/cms/10.1016/j.jaci.2021.08.016/attachment/cbfd92f8-71be-495f-8d8c-4bc85809c1e9/mmc1.docx
Durkee-Shock, J. R.	2022	https://doi.org/10.1016/j.anai.2022.06.009	DC	Review paper to provide an update on the state of literature regarding SC2 vax in IEI population, data from multiple international cohort studies. Brief summary of efficacy for pts on immunosuppressive therapy, recommendations for vax in IEI.	All IEI	Mixed	Mixed (across studies)	NA	Both	In reviewed literature (26), around 73% had Ab resp to vaccination	Varied by paper	Overall neut Ab detected in IEI pts at lower level than HC	NA	Yes -- effect of VOC on therapies	Seroconversion: low in CVID in Fernandez et al, large cohort in van Leeuwen
Erra, L.	2022	doi:10.1007/s10875-022-01382-7.	Argentina	Study evaluating adult and pediatric patients with IEIs, age-matched healthy controls, for immune response to different SC2 vaccines. Antibody titer, neutralization antibodies were lower in IEI compared to HC. No difference in humoral response between IEI patients with/out previous infection.	PADs, others	CVID, specific Ab deficiency, selective IgA deficiency, HGG, HIGM, XLA. Other: autoinflammatory, CIDs, PIDs, congentinal defects, intrinsic/innate immunity	AP: AZ, Sputnik V or both, Sinopharm, mRNA. PP: mRNA	118	Both	80.6% IEI, 100% HC. Significant differences between AP and PP - at T2, 71.4% of AP but 97.4% PP	ELISA	81.0% of AP sera, 97.2% PP sera	Pseudovirus neutralization assy	No, just Wuhan	Significant differences in Ab response with Moderna compared to others.
Fernandez Salinas, A.	2022	10.1016/j.jaci.2021.08.031	Italy	Correspondence between Hagin et al and Salinas et al regarding the respective conclusions, data, and interpretation of both their findings/contribution to this area of the field.	Predominantly antibody deficiencies	CVID	Pfizer	n=33		0.33	Not specified
Goda, V.	2022	10.3389/fimmu.2022.907125	Hungary	Study evaluting humoral and cellular immune response in CVID patients against SC2 primary series and additional booster. Booster raised anti-spike antibody value from 70-83%, but overall less than HC.	PADs	CVID, "CVID +" (defined by authors)	Pfizer and AZ	n=70	Both	16.6%(IgM), 36.6% (IgA)	DiaSorin immunoassay (S1-S2), ELISA (RBD)	80% over cut-off value	Surrogate virus neutralization kit	No	Specifically observing heterogeneous vax regimen in IEI + immune response
Goschl et al	2022	https://doi.org/10.3389/fimmu.2022.974987	Austria	Cohort study of the safety and immune response to SC2 vax in pts with IEI/MBLdef.	IEI or MBLdef	CVID, HGG, WHIM, XLA, Muckle Wells, CAPS, IFN-gamma defect, MBLdef	Pfizer, Moderna, AZ	n=26	Both	20/26 above threshold, but lower compared to HC. Lower age~lower response. Low levels in CVID pts, one received rituximab	Roche Elecsys immunoassay	All? Moderna more likely than AZ to mount neut activity, AZ had lower specific Ab levels.	Vero cell assay	No	**Analyzed patients on IgGRT
Hagin, D.	2021	10.1016/j.jaci.2021.05.029	Israel	Evaluated humoral and cellular response to SC2 primary series in patients with different IEIs. Samples collected 2 weeks after 2nd dose. XLA patients had no humoral but did have cellular response.	Mixed	XLA, NFKB1-HI, CID, STAT1, STAT1-GOF, STAT3-LOF, complete complement C4 deficiency.	BNT162b2 mRNA (Pfizer)	n=26	Both	81.8% (XLA had no response, were excluded so n = 18/22)	ELISA	85.7% (Again excluding XLA). Younger CVID patients showed higher average inhibition than older CVID patients, 68.98% vs. 21.98%.	ELISA	No	**NFKB1-HI patients. B-cell negative patients had stronger cellular response than HC.
Hurme, A.	2022	https://doi.org/10.1016/j.jaci.2021.12.103	USA	Short abstract of humoral response in IC versus healthy patients during SC2 infection or vaccination.	IEI	Unspecified	Infection or vax	n=40	RBD	68%, 27 patients	ELISA
Illes, P.	2021	10.1177/21526567211056239	USA	Case study of one XMEN/MAGT1 pt's successful response to SC2, with reactive anti-S antibody.	Monogenic Adult onset IEI	XMEN/MAGT1	mRNA/Pfizer	n=1	Spike			NA	NA	No
Jalil, M.	2022	https://doi.org/10.3389/fimmu.2022.982155	China	3 year non randomized cohort study of children/adults wioth IEIs to evaulate humoral/cellular response after 3dose series of SC2 vax. Observed through vax series.	IEI		Pfizer and CoronaVac	n=39	Both	18/33 (55%) positive at dose 2, 17/23 (74%) positive at dose 3	ELISA	Patients with immune dysregulation against WT (93.6%) post vax3, but most patients on either vax formulation could not neutralize Omicron	ELISA	Yes, Omicron
Karabiber, E.	2022	DOI: 10.1101/2022.07.14.22276948	USA	Prospective study analyzing B and T cell responses in PAD patients after SC2 vax. Found robust cell responses after primary and then enhanced again after booster series.	PAD	Mixed (CVID, HGG, Specific antibody deficiency)	mRNA/all	n=30	Both	0.86	His-tagged spike and RBD binding probes	SC2 specific memory B cells correlated with NA titers against Omicron following booster	ASSUMING - psuedo virus neutralization assay	Yes, Wuhan, B.1.617.2, B.1.1.529
La Civita, E.	2022	10.1038/s41586-021-04388-0	USA	Observational study of sera from mixed cohort of pts with previous infections, 2vax regimen, and booster, Omicron variant displayed resistance to neutralization from these pts. Evaluation of MCA against clusters on spike protein, found 17/19 were abolished/impaired. Identified 4 new spike mutations for antibody resistance in SC2.	NA	NA	mRNA, mixed : Moderna, Pfizer, J&J, AZ	n=64	Spike	NA	NA	10 samples from infected with Wuhan strain: >32-fold drop in infectious dose titers. In all sera from vaxxed pts, showed substantial loss in neutralizing potency against Omicron. Booster: mean drop of 6.5 fold neutralization activity	Variant plasmid construction, Authentic + Pseudovirus Neutralization assays	Yes, Omicron	Yes for mAb therapy
Leung, D.	2023	https://doi.org/10.3390/vaccines11020354	Latvia	Cross sectional study evaluating the cellular and humoral response to SARS antigens in patients with IEI.	PADs	CVID, Selective IgA deficiency	Infection or (mostly) Vaccination	32	NA	Median level of antibody response in CVID patients was lower compared to healthy controls, wide range of Ab levels.	ELISA	NA	NA	No
Lin, F. J.	2023	10.3389/fimmu.2023.1131604	Ireland	Study comparing SC2 vaccine response between healthy controls and IEI/SID individuals. Measured IFN-Y and specific antibody levels only. A notable proportion of the cohort were infected during the study; disease severity is also evaluated.	Mixed Immunodeficiencies	IEI (CVID, XLA), SID	AZ and Pfizer?	71	Spike	70% IEI, 64% SID	Roche Elecsys immunoassay	NA	NA	No, just Wuhan
Liu, L.	2022	10.3389/fimmu.2022.934476	Denmark	Observational study of Anti S RBD antibody after Sars-Cov-2 (SC2) 4x vax and mAb; and antiS-RBD levels in IgGrT products. Found that additional vax doses = more protection/increase antibody levels. mAb antibody levels outperform vax.	Predominantly antibody deficiencies (PADs)	Common Variable Immunodeficiency (CVID)	mRNA	n = 33	Both (Anti-S-RBD)	mAB naïve patients: 165 BAU/ml increase between 2nd-3rd dose	SC2 IgG II Quant assay.	N/A	N/A	No	mAb therapy measured, using non-paried Wilcoxon signed. rank test. Increase of 2,035 BAU/ml after mAb.
Lucane, Z.	2022	https://doi.org/10.1001/jamaoncol.2022.0446	Switzerland	Prospective longitundinal monocentric comparative effectiveness study to evaluate humoral response after 2 doses of SC2 vaccination. Measured antibody levels at 1 week, month, 3 mos, 6 mos post vaccination.	IC	Solid cancers, hematologic cancers, solid organ transplants, autoimmune diseases	BNT162b2 mRNA (Pfizer) or mRNA-1273 (Moderna)	841	Spike	Solid cancers: 98.3%, hem cancers: 95.0%, significantly lower in patients with whole organ transplants: 65.5%, autoimmune:81.8%, treated hem cancers: 86.0%	Luminex based in-house assays	nAB titers deceased 3.5-5 fold between 1-6 mos, estimated duration was greater with Moderna.	Luminex based in house assays	Yes, original/nonvariant, Alpha, Beta, Gamma, and Delta	Referenced as "ImmunoVax Study"
Mizera, D.	2022	10.3389/fimmu.2022.858399	Belgium	Study of five clinical groups of immunocompromised (IC) patients evaluated for humoral and cellular reponse. Measurements taken at various time points post-vax. Mixed antibody response in IC groups. Overall immune response depended on individual diagnosis, risk factors, therapy - these factors should guide counseling of IC pts with SC2 vax.	Mixed	PID, HIV, CKD/other	BNT162b2 mRNA (Pfizer)	PID = 57, HIV = 27, CKD/other = 39	Spike	94.9% CKD at T1. 100% of HIV + CKD at T2 and T3 (Within CKD: 50.0% rheumatologic pts and 48.0% neuro pts at T2, 52.4% rheuma and 50.0% neuro at T3.) 94.5% of PID at T2, 89.1% at T3.	DiaSorin immuoassay	NA	NA	No	Humoral and cellular responses were measured at defined time points after vax: T0 = prior to vax, T1 = 2-28 days after 1st dose, T2 = 10-14 days after 2nd dose, T3 = 3mos after 2nd dose. Cellular response only evaluated at T0 and T3.
Mortari, E.P.	2022	10.1016/j.jaci.2021.11.022	USA	Double center retrospective review on humoral and cellular response to SC2 primary series in PID and functional B-cell defect patients; ACE2 as surrogate test for neutralization. No known infections prior to vaccination in patient cohort.	Predominantly antibody deficiencies	CVID, HypoGG, SelAD, Good syndrome, AGG, hyper IgM syndrome, PIK3R1 deficiency, CTLA-4, combined ID, ATP6AP1	BNT162b2 or mRNA-1273	n=33	RBD/S1	CVID = 80.0%, Other = 22.2%	ELISA	CVID = 8.3%, other = 25.0%	ELISA	No
Murray, C. E.	2021	10.3390/cells10112915	Italy	CVID patients with previous infections/no vax, vax/no infection, and infection + vax evaluated for anti-S antibodies and spike-specific B/T cells. Previous infection = better B cell response, vax = noncanon B cell response, nat infection protection boosted by vax.	PADs	CVID	BNT162b2 mRNA (Pfizer)	n = 34 natural infection, 38 vaccination	Spike	82% natural infection; 34% vax	ELISA	N/A	N/A	No
Nielsen, B.U.	2022	10.3390/cells11121918	Italy	Observational study of humoral and cellular response to 3rd SC2 vax in CVID patients with no prior infection, age matched with 26 healthy controls. Samples obtained after 2nd+3rd dose. Non responders/seronegative had more complex phenotype/lower levels of T/B cells.	PAD	CVID	mRNA Pfizer	n=47	Spike	0.64	ELISA	NA	NA	No	Did genetic analysis for variants of interest, found some correlation between variants and hum+ cell immune response. Overall heterogeneity of immune response = need to sudy/link vax response to immunological profile
Nourizadeh, M.	2021	https://doi.org/10.3389/fimmu.2021.815404	Italy	Review paper assessing what is known about SC2 vaccination + immune response in CVID poulations, and potential benefits from additional strategies and therapies, such as MCAb.	Primary Antibody Deficiencies	CVID	NA	NA
Obeid, M.	2021	10.1007/s10875-021-01133-0	Italy	Study evaluating CVID and XLA patients age matched with HC for antibody production, specific memory B cells/T cells before vax + 1st dose of Pfizer. All HC had antibodies, but no patients had RBD specific B cells. Previously infected CVID patients had better response.	PAD	CVID, XLA	BNT162b2 mRNA (Pfizer)	n=47	Both	20.6% of SC2 naïve CVID, none in XLA	ELISA	XLA none, ~1/3 CVID produced S+ATM's B cells	B cell measurement	No	***Do not expect major changes in immune response to SC2 with time after vax
Oyaert, M.	2022	10.3389/fimmu.2022.827048	USA	Studied antigen-specific activation of CD4+ memory cells, isotype-specific and functional antibody responses in CVID patients.	PADs	CVID, oPADs	BNT162b2 mRNA (Pfizer)	n = 31 CVID, n = 39 oPAD	Spike	15/31 (48.4%); oPAD comparable to HC	ELISA	All three study groups had significantly higher sVNT antibodies after primary series.	SC2 Neutralization Antibody Detection Kit	No
Pham, M.	2021	10.3389/fimmu.2021.803742	Austria	Analyzed B cell subsets as a predictor of humoral immune response. Number of circulating naïve Bcells was positively associated with antibody levels.	Mixed: IEI, immunocompromised	PID, autoimmune disease, hematologic disease, B-cell depleting therapy	mRNA-1273 (Moderna) or BNT162b2 (Pfizer)	n = 120 immunocompromised	Both (RBD and TSP)	67% (n=80), 82% (n = 98) per assay	Roche Elecsys immunoassay, DiaSorin immunoassay	NA	NA	No
Pulvirenti, F.	2021	DOI: 10.1101/2021.12.19.473354	Sweden	Study showing Omicron is incredibly resistant to neutralization via several different MCAb, by cloning Omicron spike from diagnostic sample. Samples were from vaxxed pts, infected infected then vaxxed, random sample of seropositive blood donors. Titers were reduced 7-45-fold compared to original strain.	NA	NA	mRNA, mixed : Moderna, Pfizer, J&J,	n= 43	Spike	NA	NA	7-45 fold loss in neutralization across serum sample groups	Pseudovirus neutralization assy	Yes, Omicron	Seropositive blood donors, then Infected then vaxxed cohort (high-risk healthcare workers) showed best protection against loss of neutralizing capacity w/ Omicron	Yes--S309/Sotrovimab only had 2-fold loss against Omicron
Pulvirenti, F.	2022	10.3389/fimmu.2022.912571	UK	Evaluated the immunogenecity of a third SC2 vax in a cohort of patients with antibody deficiency in consideration of rising VoC and poor vaccine response in IEI patients. Majority of participants were receiving IgGRt. Samples taken before + after 3rd dose. Increase in seroconversion after 3rd dose.	Primary or Secondary antibody deficiency	CVID, oPAD, SPAD, XLA, HIGM, CID, CTLA-4, APDS1, NFKB2, SAMD9L, secondary/other	BNT162b2 or ChAdOx1.	n=182	Spike	61.4% 2nd vax, 76.0% 3rd vax	ELISA	61.4% after primary series, 76.0% after 3rd dose	Live neutralization assays using Vero cells	Yes Looked at serological responses against VoC B.1.1.529/Omicron	Extended results of their previous COV-AD study. Decrease in spike antibody levels but not seropositivity 6mos after 2nd dose. SC2 infection naïve patients with heterogenous vax doses more likely to mount T cell reponse after 3rd vax. Humoral response from Pfizer formulation > AZ.
Quinti, I.	2022	10.1007/s10875-022-01231-7	UK	Multi site study of SC2 infection and vaccine in patients with PAD or secondary antibody deficiency. Looked at prevalence of (a)symptomatic infection, frequency of viral persistence. Determined serological and cellular responses, found Pfizer > AZ. Found reduced immunogenecity in antibody deficient pts.	PAD or SecAD	CVID, oPADs, Good's, XLA	Pfizer and Az	n=168	Spike	0.548	ELISA	37% CVID, 16% oPADs. Overall <10% comparable to HC	Live neutralization assays	Yes, Victoria and Delta and Omicron	Studied breakthrough infections in cohort, found P>AZ
Salinas, A.F.	2022	10.1007/s10875-022-01296-4	USA	Looked at spike protein specific T cell and antibody responses before and after vax; associations between vax response and patient clinical & immunological characteristics. oPAD patients had responses comprable to HC. Subset of CVID patients have impaired humor/cell response, which can be predicted by immune profile.	Mixed	CVID and other PADs: IgGD, IgG2D, sAbD	mRNA	n = 22 with PADs (CVID or oPADs), 15 HC	Spike	oPADs have antibody responses at comparable levels to HC after 1st/2nd vax, 58% (n=12) of CVID ONLY after 2nd vax	ELISA	HCs and patients had increase in neutralization activity after 1st and/or 2nd dose	SC2 Surrogate Viral Neutralization Assay	No	The 5 CVID patients who did not mount anti-S antibody response after 2nd vax were receiving IgGRT.
Sauerwein, K. M. T.	2022	10.1016/j.vaccine.2022.07.046	USA	Case study of three XLA patients' humoral and cellular response to the SC2 primary series. XLA pts have previously demonstrated poor humoral but noticeable cell immune response. 1/3 pts showed positive SC2 antibody response. Vaccine should be encouraged for XLA patients to account for some who may have humoral response.	Primary Antibody Deficiencies	XLA	mRNA-1273 (Moderna)	n=3	Spike	0.3	Not specified	NA	NA	No	For more info: Table 2 shows prevoius studies observing SC2 vaccine in XLA patients
Schulz, E.	2022	10.1016/j.jaci.2022.04.002	Varied: Rotterdam, Utrecht, Amsterdam, Maastricht, Groningen, Leiden, and Nijmegen, The Netherlands	Prospective, controlled, multicenter study of the humoral and cellular response after SC2 primary series in adult IEI patients. Measured at baseline, 28 days pre/post 2nd dose.	Mixed	CVID, XLA, isolated/undefined antibody deficiencies, combined B/T cell ID, phagocyte defects	mRNA -1273 (Moderna)	n=505	Both	Overall: rates in patients with mild AD and phagocyte defects were similar to HC. 100%: unAD, phagocyte defects. SPAD: 98.3%, XLA: 15%, CVID:81%	ELISA	IgG/SPAD: 100%, CID: 86%, CVID: 72% (Only tested these subgroups). Ab Titers correlated well to neutralizing antibodies.	PRNT, pseudovirus neutralization assay	No	Low humoral response (poor seroconversion), but good cellular response in patients with XLA. Severe adverse effects in some patients after vaccination. In CVID, noninfectious complications correlated with poor antibody response.
Sheward, D.J.	2022	10.1016/j.xcrm.2022.100653	USA	Study assessing immune response of SC2 primary series + booster in patients with PADs. Boosting provides higher levels of neutralizing antibody against Wuhan strain and VoC. Those with previous infection + vax have higher responses.	Primary Antibody Deficiencies	CVID, other	mRNA	n=27	Both	Increase after primary series but wane by 90 days.	ELISA	83% of PAD against Wuhan. Overall, most vaccinated PADs have enough neutralizing antibody titer for protection against ancestral SC2 + Delta, not Omicron.	FRNTs	Yes, WA1/2020, B.1.617.2, and B.1.1.529
Shields, A.M.	2023	doi: 10.3389/fimmu.2023.1146500	Australia	Cohort study of patients with mostly primary and some secondary immunodeficiencies, assessing humoral and cellular response over 22 mos/1-4 vaccine across three vaccine types: Pfizer, Moderna, AstraZeneca. Humoral response was lacking but T cell response was robust.	Primary or Secondary antibody deficiencies	CVID, XLA, Secondary hypogammaglobulinemia (SHG)	mRNA-1273 (Moderna), BNT162b2 (Pfizer), ChAdOx1 (AstraZeneca-Oxford)	n = 28 (PAD), n =3 (SAD), n = 10 (HV)	S1	Only 24% had anti S1-antibodies after primary series. After doses 3-4, levels were detectable in all disease groups. But at 3 mos after dose 4, 11/12 (92%) had detectable antibodies.	In house enzyme immunoassay (EIA)	NA	NA	Yes, wild-type, Delta, and Omicron BA.2, but ONLY for T-cell activation.	See corresponding entry for this paper in Table S2.
Shields, A.M.	2023	doi: 10.3389/fimmu.2023.1194225	Irvine, CA, USA	Longitundinal study on CVID patients naive to SC2 infection at time of enrollment during the 3-4 vax dose of Pfizer, measuring specific/neutralizing antibodies, memB cells, T cells. More patients have specific antibodies than high-affinity specific memB cells. Authors identified 4 functional groups of B cell phenotypes, T cell functions, clinical disease.	Primary Antibody Deficiencies	CVID	BNT162b2 mRNA (Pfizer)	n = 47, n = 22 HV	Both/RBD	After dose 3, 30/47 63.8% CVID seroconverted	Chemiluminescence microparticle antibody assay	Differed by functional groups - lower is 2, 3, absent in 4	Microneutralization assay	Yes - wild type, Omicron BA.5	See corresponding entry for this paper in Table S2.
Shin, J. J.	2 0 2 3	https://doi.org/ 10.3390/v15081659	Italy	Study on mixed cohort of CVID patients, kidney transplant recipients, and healthy donors, evaluating the humoral and mainly cellular response after 3 doses of Pfizer. Successful humoral response after 3 doses; found positive correlation between anti-S IgG and neut Ab titer. Similar levels of IFN release between groups. Hybrid immunity shown to be more effective for humoral and cell response.	Primary or Secondary antibody deficiencies	CVID, Kidney transplant	BNT162b2 mRNA (Pfizer)	n = 19 (CVID), n = 17 (KTR), n = 10 (HV)	Both	21 days after dose 3, CVID and KTR has significantly lower anti-S concentration than HV. No relevant differences in age + sex.	Roche Elecsys immunoassay	Higher titers in HV than CVID, but no significant difference between KTR and HV, or CVID and KTR. Positive correlation between these titers and anti-spike concentration.	Neutralizing titers obtained	No
Squire, J.D.	2023	https://doi.org/10.1007/s10875-023-01468-w	Germany	Study of sero non/responders' antibody quality, B cell immunity, and T cell responses after SC2 vaccination.	Primary Antibody Deficiencies	CVID	mRNA/unspecified?	n = 24	S1	Significantly lower responses in CVID responders than HV.	ELISA and Seraspot	NA	NA	NA	See corresponding entry for this paper in Table S2.
Steiner, S.	2023	doi: 10.3389/fimmu.2023.1217718	Boston, MA, USA	Study of pediatric cohort with PADs, compared to adult PAD cohort, following initial SC2 vax series and booster. Subclassed as mild, moderate, and severe. After monovalent 3rd dose, mean anti-spike antibody levels in pediatric cohort increased significantly.	Primary Antibody Deficiencies	CVID, SAD, IgG subclass deficiency, primary HGG	BNT162b2 mRNA (Pfizer)	n = 15 (pediatric), n = 62 (adult comparative cohort)	Both (Anti-S-RBD)	Pediatric cohort (13) had higher mean Ab levels compared to adult cohort, severe PAD had higher Ab levels compared to adults. After booster, Ab level increased in pediatric cohort.	Roche Elecsys immunoassay	NA	NA	NA	See corresponding entry for this paper in Table S2.
Tandon, M.	2023	doi: 10.3389/fimmu.2023.1275892	Poland	Study evaluating authors' hypothesis that effectiveness of CV19 vaccine doses 1-4 in adults with PADs who underwent at least a year of IgRT would depend on disease subtypes' specific humoral/cellular characteristics. Humoral response was found not to have association with IgRT mode or dosage. Correlated positively with NK cells but not B cells.	Primary Antibody Deficiencies	XLA, CVID, IgG subclass deficiency, unclassified IgG deficiency	BNT162b2 mRNA (Pfizer)	n = 57 total, 49 received vaccine	S1	91.2% seroconverted, wide range of titers. All CVID patients has ~5 fold decreased titers compared to other subgroups, but XLA patients had fairly high titers. No difference found in titers between those who had been infected vs. not.	ELISA	NA	NA	NA	See corresponding entry for this paper in Table S2.
van Leeuwen, L.P.M.	2023	https://doi.org/10.1007/s10875-023-01514-7	The Netherlands	Prospective multicenter study of 473 IEI patients up to 6mos after primary vax series and a 3rd dose in 50 CVID patients. Evaluated humoral and cellular response. At 6mos, mean ab titers declined in HV and IEI compared to ~1mo post-vax. T cell responses still present in 77% of HV and 68% of IEI.	Primary Antibody Deficiencies/Mixed	CVID, XLA, CID, undefined AD, phagocyte defects	mRNA-1273 (Moderna), third dose BNT162b2/mRNA-1273/unknown	n = 473 total, 179 controls/HV	S1 and S2	Ranged from 5.9 - 11.2 fold decline (CVID and SPAD). At 6mos, SP ranged from 73-98% in CVID and IgG/SPAD cohort. Much lower rates in XLA comparatively, 24% at 6mos.	Luminex assay	Based on subset of patients for neutralization analysis (258) - at 6mos, ranged from 59% to 78%, decline from 28 days (activity and titers). Titers only correlated with S-specific IgG at both time points.	Pseudovirus neutralization assay/system	NA	See corresponding entry for this paper in Table S2.
van Leeuwen, L.P.M.	2023	doi: 10.22034/iji.2023.97759.2525.	Iran	Cross-sectional study on humoral response to SC2 vaccine in IEI patients and HV.	Mixed	CVID, HIES, XLA, CGD, hereditary angioedema	Sinopharm, AstraZeneca, Sputnik	n = 41, n = 32 (HV)	RBD	Wide range of antibody production, lower than HV	ELISA	Strong positive correlation between anti-RBD ab and IgG concentration	Conventional Virus Neutralization test, ELISA	No
Yam-Puc, J.C	2023	https://doi.org/10.1038/s41467-023-38810-0	UK	Study primarily focused on age-associated B cells, and whether they are similar between those with IEI and cancer w/ immune check point blockade + how the immune response to SC2 (primary series) is affected over time. Higher baseline ABC associated with lower levels of specific memB cells and less neutralizing activity.	Mixed	Cancer patients treated with ICB, NFKB1, CTLA4	BNT162b2 mRNA (Pfizer)	n = 38 total	Both	All but two IEI/cancer patients seroconverted at comparable levels to healthy controls. Authors deemed previous infection unlikely in this cohort.	Luminex bead based immunoassay	All except 5 of IEI/cancer had noticeable neutralizing capacity at any time through study, even with noticeable ABs.		No, only wildtype	See corresponding entry for this paper in Table S2 and S3.
Zendt, M	2023	10.5578/tt.20239705	Turkey	Study of IEI patient receiving a wide range of vaccine types and doses (1+), about half of cohort was infected. Measured humoral response to vaccines and infection outcome.	Mixed	PADs, immune dysregulation, CID, phagocyte defects, complement deficiency	Mixed: all mRNA, inactivated, or combination	n = 88	Unspecified	No significant difference in ab levels between vaccine types/combinations.	Roche Elecsys immunoassay	NA	NA	No
Zimmerman, O.	2023	10.1126/sciadv.adh3150	USA	Prospective cohort study comparing cohort of IEI to HV, measuring IgG, psuedoneutralization capacity, variants from pre-vax to post dose 3. Overall, median ab concentration of IEI never higher thn roughly 1/3 that of HV concentration at any/all time points.	Mixed	CVID, HGG, PIRD, APECED, signal transducer and activator of transciption 3 dominant-negative disease, CID, other IEIs, other immune disorders	Mixed: BNT162b2, mRNA-1273, JNJ-78436735	n = 195 IEI, n = 35 HV	Spike	87.5% in IEI 1mos after primary series, 92.0% 6mos post primary, 92.4% 1mos dose 3, 92.6% post dose 3	ELISA	At 6mos post primary series, declined to 45% across IEI subgroups and variants	Electrochemiluminescence	Yes - Beta, Gamma, Omicron BA.1, ancestral, Alpha, Delta

## Sheet: Table S2 Memory T-Cell Response
Lead author	Year published	DOI	Country	Summary/Important Findings	T cell type (CD4/CD8)	Type of IEI	Gene Defect	No. of patients	Vaccine formulation	Vaccination series (Primary or booster)	Correlation with ab titer	Method of T cell testing	Variants?	Supplement Links or Notes
Amodio, D.	2021	https://doi.org/10.3389/fimmu.2021.727850	Italy	Observational longitundinal study evaluating the humoral and cellular response after SC2 vax at timepoints in IEI vs HC.	CD4	PID	CVID, unPAD, XLA	21	Pfizer/BNT162b2	Primary	After 2nd vax, increase in SC2 specific Ab and specific CD4 in IEI and HC. Five IEI had no cellular response. IEI had very few switched B cells (mean = 3.4%)	AIMS, Flow Cytometry	No
Antoli, A.	2022	10.3389/fimmu.2022.895209	Spain	Prospective study assessing humoral and cellular specific immune response to SC2 vax; predictors of poor response in CVID+MS/BCDT pts. Samples obtained pre all vax/post 2nd vax.	All/unspecified	PAD, other	CVID, MS treated with BCDT	70 (31 CVID, 25 BCD, 14 control)	Mixed (Pfizer, Moderna, AZ, J&J)	Primary (observed pre dose 1 and post dose 2)	Low CD19 peripheral B cells, switched memory B cells, and low CD4/CD8 T cell ratio -- predictors of poor Ab resp for CVID pts. None found for BCDT pts. CVID pts had lowest cellular resp.	IFN-y ELISA	No	Included test for specific antibodies against Salmonella typhi beofre and after vaccination for polysaccharide immune response.
Arroyo-Sanchez, D.	2022	https://doi.org/10.1007/s10875-021-01174-5	Spain	Prospective study of CVID pts receiving SC2 vax evaluated for SC2 specific antibodies and T cell response, measured pre/post each vax. Compared to HC		PAD	CVID	18	Moderna, Pfizer, AZ	Primary	50% pts had response after vax1. 83% positive after vax2. Overall rate CVID>HC. 3 CVID pts had no response after full vax.	IFN-y ELISPOT	No
Barmettler, S.	2022	https://doi.org/10.1016/j.jaip.2022.03.017	USA	Study aiming to characterize Ab response to SC2 vax series in PAD pts compared to HC at baseline, after each vax dose.	CD4	PAD	CVID/SAD, HGG, IgG subclass deficiency, complicated PAD	62	Mixed (Pfizer, Moderna, J&J)	Primary, booster for subset 31 pts	Low Ab response correlated with low CD$ T helper cells, low CD19 B cells, low class switched memory B cells.	Not disclosed	No
Barouch, D. H.	2021	10.1056/NEJMc2108829	USA	Letter to the editor describing 8 month durability of humoral and cellular responses after J&J vax; neut antibody responses against different SC2 strains.	All	HC	HC	25	J&J	Primary	Not measured, instead median T cell responses (in %) at different time points	Intracellular cytokine staining assays, Flow cytometry	Yes
Barrios, Y.	2022	10.15586/aei.v50i3.583	Spain	Study of humoral and cellular response to two doses of the SC2 vaccine in CVID patients; evaluating in vivo DTH skin test as a measure of T cell function.	All/unspecified	PAD	CVID	17	Pfizer/BNT162b2	Primary	IGRA positive in 14/17 specific stimulated patients. All positive for unspecific antigens.	IFN-y ELISA	No
Bergman, P.	2022	https://doi.org/10.1007/s10875-022-01244-2	Sweden	Prospective open label clinical trial evaluating humoral and cellular response to SC2 vax (either 1 or 2 doses) in CVID vs HC patients. CD4 cell count correlated with humoral response. Poor switched memory B cell = poor response.	CD4/CD4 memory	PAD	CVID	50	Pfizer/BNT162b2	Primary (observed at dose 1 and 2)	Vax nonresponders had lower counts of CD4/CD3/CD19, median CD21 B cell freq were elevated in nonresp (negative association). Low mem B cells-poor responders. Low levels of naïve CD4 T cells correlate with poor vax resp	IFN-y ELISPOT, AIMS; Flow cytometry	No
Bloomfield, M.	2022	https://doi.org/10.1007/s10875-021-01163-8	Czech Republic	Case study of 7 patietns with STAt1 GOF to evaluate the humoral and cellular resp after SC2 vax. Included two pts with JAK inhibitors.	Unspecified	Disorders of immune regulation	STAT1 GOF	7	Pfizer/BNT162b2	Primary	6/7 patients were able to mount cellular immune resp to vax	IGRA (whole blood)	No
Durkee-Shock, J. R.	2022	https://doi.org/10.1016/j.anai.2022.06.009	DC	Review paper to provide an update on the state of literature regarding SC2 vax in IEI population, data from multiple international cohort studies	Varied by study				Mostly mRNA	Primary and/or booster	T cell responses overall present in IEI pop, poorer responses often in CVID pts.
Erra, L.	2023	https://doi.org/10.1007/s10875-022-01382-7	Argentina	Cohort study evaluating the safety and immunogenecity of AZ, Sputnik, Moderna/Pfizer, Sinovpharm vax in IEI pts in Argentina	Unspecified	IEI		118	Sputnik, AZ, Moderna, Pfizer, Sinopharm	Primary?	Positive specific IFN-y response in 84.5% patients, 82.1% presented s specific TFH cells. Similar vax cell response between formulations, best humoral with Moderna	IFN-y ELISPOT; AIMS, flow cytometry	No
FDA Office of the Commissioner	2022	https://www.fda.gov/news-events/press-announcements/coronavirus-covid-19-update-fda-limits-use-janssen-covid-19-vaccine-certain-individuals	USA	News release with updated information on the use of the J&J vax, which is to be limited in certain individuals bc of risk of TTS	NA	NA	NA	NA	NA	NA	NA
Gao, Y.	2022	https://doi.org/10.1016/j.immuni.2022.07.005	Sweden	Prospective open label clinical trial, observed profile of SC2 specific T cells after vax in HC and pts with immunodeficiencies. Found spectrum of T cell responses across immunodeficiency syndromes.	Both	Mixed ID	PID, HIV, HSCT, SOT, SLL	235 ID, 44 HC	Pfizer/BNT162b2	Primary	Tracked longitundal evolution of T cell response during vax: increased after each dose in all groups. CLL and SOT showed lowest response. CD8 cells induced at lower freq than CD4 cells. Found correlation between T cell and Ab reponse in all groups	AIMS, Flow Cytometry	Yes, tested if T cell responses to Delta variant in PID patients varied, found no freq differences	Investigated durability of T cell response and polyfunctionality
Goda, V.	2022	https://doi.org/10.3389/fimmu.2022.907125	Hungary	Study evaluating humoral and T cell responses to SC2; changes in CVID pts receiving booster vax.	Both	PAD	CVID	40	AZ primary then Pfizer booster	Primary and booster	At 53%, then 83% after boosting	IFN-y ELISPOT	No
Goschl et al	2022	https://doi.org/10.3389/fimmu.2022.974987	Austria	Cohort study of the safety and immune response to SC2 vax in pts with IEI/MBLdef	Both	IEI, MBLdef	CVID, HGG, WHIM, XLA, Muckle Wells, CAPS, IFN-gamma defect, MBLdef	21 total, 11 for cell	Moderna, Pfizer, AZ	Primary	9/11 (82%) had response to specific (S1/S2) peptides post full vax series. No significant correlation between T cell resp + Ab titer. No difference in number of CD4/CD8 cells	IFN-y ELISPOT	No
Gupta, S.	2022	https://doi.org/10.1007/s10875-022-01256-y	USA	Study specifically observing T cell response after SC2 vax or infection in PADs pts.	CD8 and CTL	PAD	CVID, XLA	12	Pfizer/BNT162b2	Primary	CVID = reduced T cells in natural infection and vax, XLA had robust levels of specific T cells after infection	Intracellular cytokine staining and pMHCI tetramers, Flow cytometry	No
Hagin, D.	2021	https://doi.org/10.1016/j.jaci.2021.05.029	Israel	Cohort study evaluating humoral and cellular response in IEI pts after SC2 vax. Samples collected after vax2. Observed differences in results by type of IEI.	Unspecified	Mixed	PAD, CID, Immune dysregulation, genetically defined	26	Pfizer/BNT162b2	Primary	19/26 (73.1%) had positive response. 7 non resp total, Only 1 nonresp had no humoral response. No SS differences between IEI and HC for cell response.	IFN-y and IL-2 ELISpot	No
Kinoshita, H.	2021	doi:10.1007/s10875-021-01046-y.	USA	Small cohort study of adult and pediatric patients with antibody deficiencies during the course of a SC2 infection, assessing the immune response via serology. Found robust T cell and humoral responses from their IC group.	CD4, MemT	PADs/mixed IC	CVID, HGG, Specific antibody deficiency	5	Natural infection	NA	No correlation with ab response. All five patients had noticeable specific CD4 T cell responses.	PMBC	No
Labrador-Horrillo, M.	2022	10.3389/fimmu.2022.881206	Spain	Case study of SASH3 patient clinical history and detailed genetic + immunological profile, vaccine response to flu B and SC2	Both	T cell defect/CID	SASH3	1	Pfizer/BNT162b2	Primary	Decreased naive CD4/CD8, elevated CD4/CD8 Temra cells, abnormal T cell activation + proliferation. marked B cell lymphopenia + reduced (pre)switch memory B cells.	Flow cytometry	No
Leung, D.	2022	https://doi.org/10.3389/fimmu.2022.982155	China	3 year non randomized cohort study of children/adults with IEIs to evaulate humoral/cellular response after 3dose series of SC2 vax. Observed through vax series.	Both	IEI	Mixed	39	Pfizer and CoronaVac	1-3 doses	Detected for both vaccines. After dose2, 48% positive for CD4, 30% positive for CD8. After dose3, 62% and 33%	Intracellular cytokine staining, Flow cytometry	Yes, Omicron BA.1
Lin, F. J.	2022	DOI: 10.1101/2022.07.14.22276948	USA	Prospective study observing immune/B and T cell responses from PAD pts after SC2 vax. Booster vax improved IgG1 class switching defect, increased specific B and T cell resp + Omicron specific memory B cells in SC2 naïve pts.	Both	PAD	CVID, HGG, SAD, Good syndrome	30	Mixed (Pfizer, Moderna, J&J)	Primary and booster (n = 19)	16/30 Pad pts had detectable specific Cd4 T cell resp. Prev infection = increased % of T cells pre vax. Booster vax improved IgG1 class switching defect, increased specific B and T cell resp + Omicron specific memory B cells in SC2 naïve pts.	pMHCII tetramer, flow cytometry;	Yes
Liu, J.	2022	https://doi.org/10.1038/s41586-022-04465-y	USA	Study showing that cellular immunity from SC2 vax is highly conserved against Omicron variant spike protein	Both	NA	NA	47	Pfizer or AZ	Primary	Durable spike specific CD8/CD4 T cell responses, cross reactive against Delta/Omicron. Median Omicon T cell resp = 82-84% of Wuhan strain resp.	IFN-y ELISPOT; intracellular cytokine staining, flow cytometry	Yes, Omicron	Looked at 8mos following vax
Lucane, Z.	2023	https://doi.org/10.3390/vaccines11020354	Latvia	Cross sectional study evaluating the cellular and humoral response to SARS antigens in patients with IEI.	Unspecified	PADs	CVID, Selective IgA deficiency	32	28 Vax and 4 infection	28 Vax and 4 infection	15 CVID patients had positive T cell response. Significant correlation between anti-spike Ab response and memory CD8 cell percentages.	IGRA (whole blood); QuantiFERON	No
Oyaert, M.	2022	https://doi.org/10.3389/fimmu.2022.858399	Italy	Observational prospective study of five clinical subgroups of IC pts to evaluate humoral/cellular resp to SC2 vax at pre determined timepoints. Cell evaluated pre all vax, post vax 2.	All (CD4/CD8)	Immunocompromised/mixed	PID, HIV, SID	199 total, 54 HC	Pfizer/BNT162b2	Primary	Specific antibody levels and IGRA results correlatd significantly for 3 subgroups: PID, PLWH, CKD for all 3 antigens of interest	IFN-y ELISA	No	Antigens of interest in T cell testing: A1 from s1/RBD subunit, Ag2 is CD4/CD8 epitopes from S1+S2 subunit, A3 is CD4/CD* from S1+2 PLUs immunodominant CD8 epitopes from whole genome.
Pham, M.N.	2022	https://doi.org/10.1016/j.jaci.2021.11.022	USA	Double center retrospective review of patients with PID who received SC2 vax, evaluated for humoral and T cell response, specifically ACE2 receptor blocking activity.	Unspecified	PID--antibody deficiency/Mixed	CVID, HGG, SAD, Good syndrome	33	Moderna or Pfizer	Primary	24/31 patients had positive IGRA, mean age was younger	IFN-y ELISA	No	Not correlated with Ab titer/measurement
Pulvirenti, F.	2021	10.3390/cells10112915	Italy	Study of CVID patients with infection, vaccine/infection-naive, then infection + vaccine for antibody and memory B&T cell response. Infection generates spike specific memory B cells which are improved by vaccine. Just vaccine generated atypical mem B cells.	Memory/Both	PAD	CVID	72: 34 infection, 38 vax only	Pfizer/BNT162b2	Primary	B cells: no linear correlation between frequency of subset and specific IgG levels. T cells: poor response in vaccine/infection convalescent group	AIMS, Flow Cytometry	No
Pulvirenti, F.	2022	https://doi.org/10.3390/cells11121918	Italy	Study evaluating humoral and T cell responses to SC2 vax and booster in CVID pts.	CD8	PAD	CVID	47	Pfizer or AZ	Primary and booster	36% were nonresp, had lower circulating naïve and central memory T cells, more complex disease phenotype + autoimmunity. CVID associated T cell abnormalities contributed to lack of specific Ab after full vax.	IFN-y ELISPOT	No
Salinas, A. F.	2021	https://doi.org/10.1007/s10875-021-01133-0	Italy	Analysis of immune response in Pad pts after SC2 vax, before vax and post vax2.	Unspecified	PAD	CVID, XLA	47 (41 CVID and 6 XLA)	Pfizer/BNT162b2	Primary	CVID pts had atypical B cells, all pts had no detectable specific B cells. 70% CVID had specific T cell responses. All but one XLA pt had T cell resp only.	ELISPOT	No
Sauerwein, K. M. T	2022	10.3389/fimmu.2022.827048	Australia	Study of 31 patients with CVID, evaluated activation of CXCR5 +/- CD4 cells. Normal antibody titers correlated with intact T cell response, even if follicular T cells were inactive.	CD4	PAD	CVID	31	Pfizer/BNT162b2	Primary	IgG responsiveness ~ normal activation of vax specific memory T cells	AIMS, Flow Cytometry	No
Shields, A.M.	2022	https://doi.org/10.3389/fimmu.2022.912571	UK	Follow up cohort study after the large COV-AD UK study, observing humoral/cellular response of SC2 booster in AD pts vs HC.		Mixed antibody deficiency	PID, SID	161	Pfizer or AZ	Booster	Infection naïve pts with mixed vax types were signifcantly more likely to have detectable T cell response. 59.6% positive after booster. Prior infection had quantatively greater T cell resp. No SS relationship between Ab resp and T cell resp.	ELISPOT (T-SPOT)	Yes, broadly cross reactive against Omicron.
Shields, A.M.	2022	https://doi.org/10.1007/s10875-022-01231-7	UK	COV-AD, multi site study evaluating immune response to SC2 infection and vax in PID/SID pts.	Unspecified	Antibody deficiencies	PID, SID	168	Pfizer or AZ	Primary	T cell responses in 46.2%, associated with significantly better Ab. Resp. No relationship between Ab resp and B cell level. No differences by vax type	IFN-y ELISA	Yes, Delta and Omicron for humoral response
Shin, J. J.	2022	10.1007/s10875-022-01296-4	USA	Evaluated humoral and CD4+ T cell immune response to SC2 vax through Ab and plasma neut activity; S-specific T cell responses in Pad pts through SC2 vax series. Correlated with immune profiles/comorbidities	CD4	PAD	CVID and oPADs	22	Moderna or Pfizer	Primary	Impaired specific Ab response linked to reduced B cell count, higher memory CD8 T cells. In IC patients, followed same trend as Ab response--increase in T cell amount after vax doses. Previous infection increased T cell amount.	AIMS, Flow Cytometry	No
Steiner, S.	2022	https://doi.org/10.3389/fimmu.2022.840126	Germany	Case study on 5 PAD patients with severe and fatal SC2 infection; lack of specific humoral response to SC2. Compared to mild convalescent COVID controls, naive COVID controls.	Unspecified	PAD	CVID, Good's	5	None, infection	None, infection	Robust/reactive CD4 T cell response, NO antibody response in all pts	AIMS, Flow cytometry		**Measured innate immune response as well, ended up being very important! See corresponding entry for this paper in Table S3.
van Leeuwen, L.P.M.	2022	https://doi.org/10.1016/j.jaci.2022.04.002	The Netherlands	Prospective, controlled, multicenter study of patients with IEI to assess humoral and cellular response to SC2 vax after each dose.	Both	Mixed	CVID, undefined ab deficiencies, XLA, combined ID	505 IEI, 192 HC	Moderna/mRNA-1273	Primary	CVID cohort significantly lower T cell response compared to HC. All other sub-cohorts comparable to HC. Limited correlation between Ab and T cell resp. Most pts developed both, Xla only T cell resp	IGRA (whole blood); QuantiFERON	No	High number on IgRT
Hurme, A.	2023	doi: 10.3389/fimmu.2023.1146500	Australia	Cohort study of patients with mostly primary and some secondary immunodeficiencies, assessing humoral and cellular response over 22 mos/1-4 vaccine across three vaccine types: Pfizer, Moderna, AstraZeneca. Humoral response was lacking but T cell response was robust.	Both	Primary or Secondary antibody deficiencies	CVID, XLA, Secondary hypogammaglobulinemia (SHG)	n = 28 (PAD), n =3 (SAD), n = 10 (HV)	mRNA-1273 (Moderna), BNT162b2 (Pfizer), ChAdOx1 (AstraZeneca-Oxford)	1-4 doses	95% had T cell responses after primary series, declined to 72% at 3mos. After 3rd dose, at 3mos 86%. After 4th dose 78% at 3mos. Smaller subset to study CD8+ responses, overall lower than CD4+ at same timepoints when stimulated with wt.	Flow cytometry	Yes, wild-type, Delta, and Omicron BA.2, but ONLY for T-cell activation.
Mortari, E.P.	2023	doi: 10.3389/fimmu.2023.1194225	Irvine, CA, USA	Longitundinal study on CVID patients naive to SC2 infection at time of enrollment during the 3-4 vax dose of Pfizer, measuring specific/neutralizing antibodies, memB cells, T cells. More patients have specific antibodies than high-affinity specific memB cells. Authors identified 4 functional groups of B cell phenotypes, T cell functions, clinical disease.	Both	Primary Antibody Deficiencies	CVID	n = 47, n = 22 HV	BNT162b2 mRNA (Pfizer)	1-4 doses	Function of CD4+ cells and expression of CD8+ was much lower in patients groups 2 and 3.	BD FACSymphony A5, analyzed with FlowJo ver. 10.8.1	Yes - wild type, Omicron BA.5	See corresponding entry for this paper in Table S3.
La Civita, E.	2 0 2 3	https://doi.org/ 10.3390/v15081659	Italy	Study on mixed cohort of CVID patients, kidney transplant recipients, and healthy donors, evaluating the humoral and mainly cellular response after 3 doses of Pfizer. Successful humoral response after 3 doses; found positive correlation between anti-S IgG and neut Ab titer. Similar levels of IFN release between groups. Hybrid immunity shown to be more effective for humoral and cell response.	Both	Primary or Secondary antibody deficiencies	CVID, Kidney transplant	n = 19 (CVID), n = 17 (KTR), n = 10 (HV)	BNT162b2 mRNA (Pfizer)	3 doses	IFN release based on S1/S2 subunits in both types of T cells were similar between experimental groups and control. IEI subgroups with hybrid immunity had higher IFN.	QuantiFERON	No
Steiner, S.	2023	https://doi.org/10.1007/s10875-023-01468-w	Germany	Study of sero non/responders' antibody quality, B cell immunity, and T cell responses after SC2 vaccination.	Both	Primary Antibody Deficiencies	CVID	n = 24	mRNA/unspecified?	Primary series	9/16 experimental group had detectable IFN. All seroresponders had SC2-reactive T cells, 5/6 non-responders had similar CD4+ response. Infection naive cohort had similar levels of polyfunctional T cells across all subgroups. No association between follicular T helper cells and humoral (Ab) response.	Flow cytometry for phenotyping, IGRA for T cell response	No		See corresponding entry for this paper in Table S3.
Mizera, D.	2023	doi: 10.3389/fimmu.2023.1275892	Poland	Study evaluating authors' hypothesis that effectiveness of CV19 vaccine doses 1-4 in adults with PADs who underwent at least a year of IgRT would depend on disease subtypes' specific humoral/cellular characteristics. Humoral response was found not to have association with IgRT mode or dosage. Correlated positively with NK cells but not B cells.	Both	Primary Antibody Deficiencies	XLA, CVID, IgG subclass deficiency, unclassified IgG deficiency	n = 57 total, 49 received vaccine	BNT162b2 mRNA (Pfizer)	2-4 doses	Vaccinated PAD patients had 3.8 fold higher IFN, similar responses between CVID and unclassified IgG deficiencies, 2.4 fold higher than XLA patients. Specifically anti SC2 IgG did not correlate with CD4+ or CD8+, but NK cells.	IGRA	No		See corresponding entry for this paper in Table S2.
van Leeuwen, L.P.M.	2023	https://doi.org/10.1007/s10875-023-01514-7	The Netherlands	Prospective multicenter study of 473 IEI patients up to 6mos after primary vax series and a 3rd dose in 50 CVID patients. Evaluated humoral and cellular response. At 6mos, mean ab titers declined in HV and IEI compared to ~1mo post-vax. T cell responses still present in 77% of HV and 68% of IEI.	Unspecified	Primary Antibody Deficiencies/Mixed	CVID, XLA, CID, undefined AD, phagocyte defects	n = 473 total, 179 controls/HV	mRNA-1273 (Moderna), third dose BNT162b2/mRNA-1273/unknown	Primary series, subset received 3rd	IFN levels decreased significantly in XLA/CVID/IgG/SPAD subgroups 6mos post-vax. But still detectable at varying levels from 20% (CID, 1/5) to 100% (3/3, phagocytic defects.) Two largest cohorts of CVID and IgG/SPAD were at 59% and 76%.	QIAGEN or EuroImmun assay	No		See corresponding entry for this paper in Table S2.
Yam-Puc, J.C	2023	https://doi.org/10.1038/s41467-023-38810-0	UK	Study primarily focused on age-associated B cells, and whether they are similar between those with IEI and cancer w/ immune check point blockade + how the immune response to SC2 (primary series) is affected over time. Higher baseline ABC associated with lower levels of specific memB cells and less neutralizing activity.	Both	Mixed	Cancer patients treated with ICB, NFKB1, CTLA4	n = 38 total	BNT162b2 mRNA (Pfizer)	Primary series	T follicular helper cells increased in IEI not cancer subgroup after primary series, CD4+ activation freq increased in IEI before + through vax. No significant difference in CD8+ freq between subgroups. No association between neutralizing capacity and pre-vax T follicular cell levels. Suggest that relationship between ABC and humoral response does not involve cellular immunity.	IFN ELISpot	No, only wildtype		See corresponding entry for this paper in Table S3.

## Sheet: Table S3 MemB & Innate Response
Lead Author	Year Published	DOI	Country	Summary & Important Findings	B cell Types	Type of IEI	Gene Defect	Number of Patients	Vaccine formulation	Vaccination series (Primary or 2+/booster)	Correlation/Relationship with antibody titer	Method of B cell testing	Any variants mentioned?	Paper supplement links or Additional Notes
Pulvirenti, F.	2021	10.3390/cells10112915	Italy	Study of CVID patients with infection, vaccination, and both infection + vax for antibody and mem B&T cell response. Infection generates spike specific mem B cells which are improved by vax. Vax only generated atypical mem B cells.	Memory/All	Primary Antibody Deficiencies (PAD)	Common Variable Immunodeficiency (CVID)	n = 74, 34 natural infection, 38 infection-naive/vaccinated	Pfizer/BNT162b2	Primary	No linear correlation between frequency of subset and specific IgG levels.	antigen tetramers, Flow cytometry	No	N/A
Shin, J. J.	2022	10.1007/s10875-022-01296-4	USA	Evaluated humoral and CD4 cell immune response to SC2 vax through Ab and plasma neut activity; S-specific T cell responses in Pad pts through SC2 vax series. Correlated with immune profiles/comorbidities	Memory/All	PAD	CVID and other PADS (oPADs)	22	Moderna or Pfizer	Primary	Impaired specific Ab response linked to reduced B cell count, higher memory CD8 T cells. Poor ab = higher B cells associated with autoimmunity.	immunophenotyping, Flow cytometry	No
Bergman, P.	2022	https://doi.org/10.1007/s10875-022-01244-2	Sweden	Prospective open label clinical trial evaluating humoral and cellular response to SC2 vax ( either 1st or 2nd dose) in CVID versus HC pts. CD4 cell count correlated with humoral response. Main finding: High frequency of the CD21 B cell subset significantly correlated with poor primary humoral response.	CD4/CD4 memory	PAD	CVID	50	Pfizer/BNT162b2	Primary (observed at dose 1 and 2)	Vax nonresponders had lower counts of CD4/CD3/CD19, median CD21 B cell freq were elevated in nonresp (negative association). Low mem B cells-poor responders.	immunophenotyping, Flow cytometry	No
Antoli, A.	2022	10.3389/fimmu.2022.895209	Spain	Prospective study assessing humoral and cellular specific immune response to SC2 vax; predictors of poor response in CVID+MS/BCDT pts. Samples obtained pre all vax/post 2nd vax.	All/unspecified	PAD, other (?)	CVID, MS treated with BCDT	70 (31 CVID, 25 BCD, 14 control)	Mixed (Pfizer, Moderna, AZ, J&J)	Primary (observed pre dose 1 and post dose 2)	Low CD19 peripheral B cells, switched memory B cells, and low CD4/CD8 T cell ratio -- predictors of poor Ab resp for CVID pts. None found for BCDT pts. CVID pts had lowest cellular resp.	immunophenotyping, Flow cytometry	No	Included test for specific antibodies against Salmonella typhi beofre and after vaccination for polysaccharide immune response.
Lin, F. J.	2022	DOI: 10.1101/2022.07.14.22276948	USA	Prospective study observing immune/B and T cell responses from PAD pts after SC2 vax. Booster vax improved IgG1 class switching defect, increased specific B and T cell resp + Omicron specific memory B cells in SC2 naïve pts.	Both	PAD	CVID, HGG, SAD, Good syndrome	30	Mixed (Pfizer, Moderna, J&J)	Primary and booster (n = 19)	16/30 Pad pts had detectable specific CD4 T cell resp. Prev infection = increased % of T cells pre vax. Booster vax improved IgG1 class switching defect, increased specific B and T cell resp + Omicron specific memory B cells in SC2 naïve pts.	antigen tetramers, Flow cytometry	Yes. Omicron BA.1 (B.1.1.529)
Salinas, A. F.	2021	https://doi.org/10.1007/s10875-021-01133-0	Italy	Analysis of immune response in Pad pts after SC2 vax, before vax and post vax2.	Unspecified	PAD	CVID, XLA	47 (41 CVID and 6 XLA)	Pfizer/BNT162b2	Primary	CVID pts had atypical B cells, all pts had no detectable specific B cells. 70% CVID had specific T cell responses. All but one XLA pt had T cell resp only.	antigen tetramers, Flow cytometry	No
Labrador-Horrillo, M.	2022	10.3389/fimmu.2022.881206	Spain	Case study of SASH3 patient clinical history and detailed genetic + immunological profile, vaccine response to flu B and SC2	Both	T cell defect/CID	SASH3	1	Pfizer/BNT162b2	Primary	Decreased naive CD4/CD8, elevated CD4/CD8 Temra cells, abnormal T cell activation + proliferation. Marked B cell lymphopenia + reduced (pre)switch memory B cells.	immunophenotyping, Flow cytometry	No
Sokal, A.	2022	https://doi.org/10.1084/jem.20220258	Mixed	In depth study to characterize the anti SC2 B cell response to SC2 vax in young/old pts with autoimmunity; genetic IEIs	Both	Defects of intrinsic and innate immunity	Defects of type I IFN response	31	Pfizer or Moderna	Primary		antigen tetramers, Flow cytometry	Yes, Omicron using ELISA
Goschl et al	2022	https://doi.org/10.3389/fimmu.2022.974987	Austria	Cohort study of the safety and immune response to SC2 vax in pts with IEI/MBLdef	Both	IEI, MBLdef	CVID, HGG, WHIM, XLA, Muckle Wells, CAPS, IFN-gamma defect, MBLdef	21 total, 11 for cell	Moderna, Pfizer, AZ	Primary	Signifcant differences in absolute numbers of class switched B lymphocytes in HGG compared to other groups. CD19 B cells unaffected.	immunophenotyping and intracellular cytokine staining, flow cytometry	No
Cuapio, A.	2022	https://doi.org/10.1186/s10020-022-00443-2	Sweden	Prospective open label clinical trial observing NK cells in IC pts and HC through SC2 vax series. Measured at pre-determined timepoints.	NK	Immunocompromised	PID, SID	50	Pfizer/BNT162b2	Primary	Positive correlation between frequency of Nk cells at baseline and Ab titers at Day 35.	immunophenotyping, flow cytometry	No	Based on Bergman et al study above
Mortari, E.P.	2023	doi: 10.3389/fimmu.2023.1194225	Irvine, CA, USA	Longitundinal study on CVID patients naive to SC2 infection at time of enrollment during the 3-4 vax dose of Pfizer, measuring specific/neutralizing antibodies, memB cells, T cells. More patients have specific antibodies than high-affinity specific memB cells. Authors identified 4 functional groups of B cell phenotypes, T cell functions, clinical disease.	Both	Primary Antibody Deficiencies	CVID	n = 47, n = 22 HV	BNT162b2 mRNA (Pfizer)	1-4 doses	CVID pts had significantly lower levels of low AND high affinity MBC, 45% and 30% respectively (n = 47). B cell phenotypic groups: 1 had both high and low affinity MBC, 2 had only low affinity, 3 had neither, and 4 had neither MBC or Abs/non-responders.	FACs LSRFortessa	Yes - wild type, Omicron BA.5
Steiner, S.	2023	https://doi.org/10.1007/s10875-023-01468-w	Germany	Study of sero non/responders' antibody quality, B cell immunity, and T cell responses after SC2 vaccination.	Both	Primary Antibody Deficiencies	CVID	n = 24	mRNA/unspecified?	Primary series	CVID seroresponders had significantly lower levels of class switched MBC even after expansion. CVID responders had a lower MBC recall response for S IgG.	ELISpot/flow cytometry	No
Yam-Puc, J.C	2023	https://doi.org/10.1038/s41467-023-38810-0	UK	Study primarily focused on age-associated B cells, and whether they are similar between those with IEI and cancer w/ immune check point blockade + how the immune response to SC2 (primary series) is affected over time. Higher baseline ABC associated with lower levels of specific memB cells and less neutralizing activity.	Both	Mixed	Cancer patients treated with ICB, NFKB1, CTLA4	n = 38 total	BNT162b2 mRNA (Pfizer)	Primary series	High baseline ABC correlates with decreased levels of antigen specific memB cells and lower neutralization activity. RBD binding B cells less frequent in IEI/cancer subgroups than controls. Authors posit that ABC's are inhibiting the development of mature/specific B cells which is negatively impacting neutralization activity.	Flow cytometry	No, only wildtype

## Sheet: Table S4 IgRT
Lead author	Year published	DOI	Country	Summary/Important Findings	Pre or post pandemic?	IVIg/SCIg	IgRT product	Brand	Generated from	No. of samples	SARS-CoV-2 antigen specificity detected	No. products where SARS-CoV-2-specific IgG is detectable	Method: Detection SARS-CoV-2-specific IgG	Neutralizing capacity	Method: Neutralizing Capacity	Variants?
Diez, J.M.	2020	10.2217/imt-2020-0095	Spain	Observational study assessing the presence of antibodies that cross-react with SARS-CoV-2. Both IVIgs were consistently reactivity to SARS-CoV, MERS-CoV and SARS-CoV-2.	Pre	IVIg	Grifols	Gamunex®-C 10%	USA	5	S1 subunit and virus lysate	2/3 (66.6%) tested	Anti-SARS-CoV-2 virus spike 1 [S1} IgG ELISA kit (Alpha Diagnostic Intl.); anti-spike protein (EI-2606-0601-G Euroimmune AG); anti-structural protein (S1 domain; DEIASL019) IgG ELISA Kit (creative diagnostics)	N/A	N/A	No
							Grifols	Flebogamma®-10 %DIF	Spain
							Grifols	Flebogamma®-5 %DIF	USA, Czech Republic, Germany
Schwwaiger, J.	2020	10.1093/infdis/jiaa593	Austria	Observational study of pre-pandemic Ig preparations, showing presence of neutralization against seasonal coronavirus but no cross-neutralization of the novel SARS-CoV-2 virus.	Pre	IVIg	Baxter Healthcare Corp	Gammagard Liquid	USA	54	N/A	N/A	N/A	0/54 (0%)	Vero E6 cell infection with SARS-CoV-2, in co-culture with IVIg. Evidence of infection assessed by microscopy.	No
								KIOVIG	Europe (Austria, Germany and Czech Republic)
Ahn, T.S.	2021	10.1016/j.jaci.2020.12.003	US	Observation study of SARS-CoV-2 RBD binding and neutralizing capacity against a clinical isolate of SARS-CoV-2 (USA-WA1/2020). Presence of cross-reactive antibodies to SARS-CoV-2 quantified in all samples. However, binding activity varied between individual lots and brands of product. 7 samples assessed for neutralization with none demonstrating the capacity to neutralize SARS-CoV-2 virus.	Pre	IVIg	Octa Pharma	Not disclosed	USA	82	RBD	82/82 (100%)	ELISA	0/7 (0%)	Vero E6 cell infection with SARS-CoV-2, in co-culture with IVIg. Evidence of infection assessed by microscopy.	No
							Grifols		Spain
									USA
							CSL		Switzerland
Dalakas, M.C.	2021	10.3389/fimmu.2021.627285	USA/Greece	Observational study undertaking blind screening of commercial IVIg products. Most products contained cross-reactive antibodies against SARS-CoV-2, these products were from 2 different manufacturers which were at titers equivalent to asymptomatically infected individuals or recently recovered COVID-19 patients.	Pre	IVIg	Baxalta Innovations GmbH	HyQvia	Not disclosed	13	S1	9/13 (69.2%)	Semi-quantitative FDA-approved and validated ELISA, Euroimmune, Germany	N/A	N/A	No
							CSL Behring	Privigen
							Biotest AG	Intratect
							Kedrion S.p.A	IgVena
							Grifols S.A.	Flebogamma
Farcet, M.R.	2022	https://doi.org/10.1093/infdis/jiab142	Austria	Observational study assessing presence of neutralizing antibody lots released since March 2020. First positive Ig lots in September 2020 with neutralizing titers steadily increasing in correlation with cumulative COVID-19 incidence, with 93% lots positive by January 2021.	Pre and Post	IVIg	Baxter Healthcare Corp	Gammagard Liquid	USA	176	N/A	N/A	N/A	81/176 (46%)	WHO validated assay: Vero E6 cell infection with SARS-CoV-2, in co-culture with IVIg. Evidence of infection assessed by microscopy.	No
Hirsiger, J.R.	2022	https://doi.org/10.1016/j.jaip.2022.06.020	Switzerland	Study quantitating anti-SARS-CoV-2 antibodies in commercial product. No anti-S-IgM abs. Anti-NCP and anti-S1-RBD IgG antibody levels highly correlated with anti-S-IgG antibody levels with no significant differences between Ig manufacturers. However time of plasma pooling was associated with presence of anti-S-IgG in product. High neutralisation to WH-1 and Alpha, reduced but measurable to Delta. …	Post	SCIg	CSL Behring	Hizentra	Not disclosed	14	Spike, S1 RBD and NCP	9/14 (64.3%) for spike, S1-RBD and NCP	anti-spike-IgG Roche Elecsys anti-SARS-CoV-2-Spike-IgG/M assay	N/A	N/A	No
						IVIg	CSL Behring	Privigen					anti-NCP-IgG and anti-S1-RBD-IgG using Luminex
							Biotest	Intratect
							Octapharma	Octagam
							Baxter	Kiovig
Lindahl, H	2022	https://doi.org/10.1007/s10875-022-01283-9	Sweden	Quantitative study of SARS-CoV-2 antibody levels and neutralizing capacity in commercial IgRT products. Products produced from May 2017 and August 2021. Product produced produced before January 2020 showed no presence of SARS-CoV-2-specific abs. Products produced post January 2020 13/30 detectable ab levels. Frequency of seropositive batches increased but some batches in 2021 did not have SARS-Co…	Post	IVIg/SCIg	CSL Behring	Not disclosed	USA	60	S1	13/60 (22%)	Abbott/Phadia ELiA SARS-CoV-2-Sp1 IgG assay	10/60 (16.7%)	Live virus microneutralization	Yes. WH-1 and Omicron
							Octapharma
							Takeda
Manian. D.V.	2021	10.1016/j.anai.2020.11.009	US	Presence of SARS-CoV-2 antibodies but no neutralization capacity in commercial IgRT products.	Pre	IVIg/SCIg	Gamunex-C	Grifols	Not disclosed	7	Not disclosed	6/6 (100%)	Euroimmune SARS-CoV-2 IgG ELISA	0/7 (0%)	Not disclosed	No
							Privigen	CSL Behring
							Hizentra	CSL Behring
							Gammagard	Grifols
Miller, A.L.	2022	https://doi.org/10.1016/j.jaci.2022.03.026	US	Quantitation of the presence of SARS-CoV-2 antibodies to whole virus in lots spanning 1 year. Lots 1-5 devoid of neutralizing antibodies, cumulative increase from lot 6 onwards. Detection of antibodies correlated with neutralization capacity.	Post?	SCIg	Hizentra	CSL Behring	Not disclosed	10	Whole virus	5/10 (50%)	ELISA to whole antigen generated from VeroE6 cells infected with SARS-CoV-2 strain USA-WA1/2020.	5/10 (50%)	mNeon-Green SARS-CoV-2 fluorescent reporter system with pseudovirus	No.
Romero, C	2021	https://doi.org/10.1016/S1473-3099(21)00059-1	Spain	First pools testing positive in Spain and USA from July to early September 2020. From September 2020 to November most pools in both countries were positive with increased titers compared to earlier in the pandemic. First pool to test positive in Central European countries was mid November 2020.	Post	IVIg	Gamunex-C	Grifols	USA	6	Not disclosed	Not disclosed	ELISA	N/A	N/A	No.
							Flebogamma DIF		Spain
									USA
									Germany
									Czech Republic
									Slovakia
Stinca, S	2021	https://doi.org/10.1371/journal.pone.0259731	Japan	Study modelling the emergence and consistent presence of SARS-CoV-2 antibodies in IgRT product. Privigen used to proving correct modelling by assessing final products processed between January 2018 and June 2021 encompassing, pre-pandemic,, and pre and post vaccine roll our time periods. Predicting abs likely to peak in Privigen in mid October 2021, at approximately 190 fold higher than convalesc…	Pre and Post	SCIg	Privigen	CSL Behring	Not disclosed	49	S1	37/49 (75.5%)	Abbott/Phadia ELiA SARS-CoV-2-Sp1 IgG assay	N/A	N/A	No.
Park, H	2022	https://doi.org/10.1016/j.jaci.2021.12.241	USA	IVIg samples collected between February 2021 and January 2022. None tested from before January 2020 had detectable SARS-CoV-2 antibodies. Levels increased at levels corresponding to COVID-19 cases pre December 2020. Dramatic increase post-December 2020 corresponds to availability of COVID-19 vaccines.	Post	IVIg	Not disclosed	Not disclosed	Not disclosed	87	Spike and NCP	Not disclosed	Elecsys anti-SARS-CoV-2 immunoassays from Roche. SARS-CoV-2 Semi-Quantitative Spike Total antibody, nucleocapsid antibodies and quantitative IgG assays.	N/A	N/A	No.
Romero, C	2022	https://doi.org/10.1016/S1473-3099(21)00755-6	Spain	Update on Romero 2021 describing how antibody levels have increased (10-50x) in all plasma pools and IVIg products regardless of geographical location. Neutralisation showed potency of IVIg from the US and Germany against wildtype and VoC (alpha, beta, gamma and delta).	Post	IVIg	Gamunex-C 10%	Grifols	USA	8	Spike	Not disclosed	Not disclosed	5/10 (50%)	wild-type SARS-CoV-2 virus and pseudoviruses	Yes. WH-1, alpha, gamma and delta
							Flebogamma DIF 5%		USA
							Flebogamma DIF 5%		Spain
							Flebogamma DIF 10%		Czech Republic
Karbiener, M	2022	https://doi.org/10.1093/infdis/jiab482	USA	Analysis of antibody levels in IgRT released between September 2020 and July 2021, manufactured from US plasma. Upward increase in neutralization titers of Ig starting with lots released in May 2021 reflecting vaccination campaigns. Increasing across June and July - variable between lots		IVIg	Gammagard Liquid	Baxalta	USA	311	Spike and NCP	Not disclosed	Abbott SARS-CoV-2 IgG and SARS-Cov_2 IgG II Quant chemiluminescent microparticle immunoassays for NCP and spike	Not disclosed	WHO validated assay: Vero E6 cell infection with SARS-CoV-2, in co-culture with IVIg. Evidence of infection assessed by microscopy.	No
Farcet, M.R.	2022	https://doi.org/10.1093/infdis/jiac358	Austria	IgRT preps collected pre pandemic or post (released March to April 2022). November 2021 to April 2022 also analysed for Omicron/ Increasing Wuhan neutralization titer of US produced products between May 2021 and April 2022 plateauing at end of 2021. Titers delayed in EU plasma lots. By April, neutralisation seen in all lots with Omicron neutralization 12 fold (US) and 22 fold (EU) lower than for …	Pre	0.1	Gammagard Liquid	Baxalta	USA	6	N/A	N/A	N/A	0/6 (0%;to either strain)	WHO validated assay: Vero E6 cell infection with SARS-CoV-2, in co-culture with IVIg. Evidence of infection assessed by microscopy.	Yes. WH-1 and Omicron B.1.1.529
					Post	0.1	Gammagard Liquid	Baxalta	USA or EU	100	N/A	N/A	N/A	100/100 (100%)
						0.1	KIOVIG	Takeda	USA or EU
						0.2	Cuvitru	Takeda	USA
Volk, A	2022	https:doi.org/10.1007/s40259-021-00511-9	Germany	Studying levels of SARS-CoV-2 S1-RBD IgG and neutralising capacity of US plasma-derived IVIg/SCIg products from end 2020 until June 2021. Substantial lot-to-lot variability, neutralisation increased from December 2020 to June 2021.	Post	IVIg	Octagam	Octapharma	USA	119	S1-RBD	unknown	anti-SARS-CoV-2-S1-RBD IgG ELISA (Euroimmune)	Not disclosed	Microneutralization assay using patient derived SARS-CoV-2 (D614G) isolate	No
							Panzyga	Pfizer
						SCIg	Cutaquig
Cousins, K	2023	https://doi.org/10.1016/j.jaip.2023.05.005	USA	Studying of SARS-CoV-2 WH1 RBD, spike and nucleocapsid IgG levels. As well as the capacity of WH1, alpha, beta, delta and Omicron RBD-specific IgG to bind to the ACE2 receptor. 85% of products examined (from donated plasma in 2020) were positive for SARS-CoV-2-specific antibodies. This strongly correlated with increased inhibition of ACE2 binding activity, with later variants demonstrating a decl…	Post	IVIg	Gammagard	Baxalta	USA or EU	125	RBD, spike and NCP	58/125 (46.4%)	In house assay	N/A	ACE2 blocking assay rather than neutralisation	WH1, alpha, beta, delta and omicron
							Gammagard SD	Baxalta	USA or EU
							Gammaplex	Kedrion Pharma	USA or EU
							Gamunex-C	Grifols	USA or EU
							Panzyga	Pfizer	USA
						SCIg	Cuvitru	Takeda	USA
							Hizentra	CSL Behring	USA or EU
							Hyqvia	Baxalta	USA or EU
							Octapharma	Octagam	USA or EU
								Xemblify	USA or EU
Lindahl, H	2023	https://doi.org/10.1007/s10875-023-01486-8	Sweden	Batches produced from donations 18 months after the SARS-CoV-2 outbreak (about July 2021) and later consistently contained high levels of WH1-specific antibodies. Low cross-reactivity to SARS-CoV-2 variants was observed, which remained consistent across different batches. Furthermore, neutralisation of beta and Omicron variants was also reduced compared to WH1.	Post	Not disclosed	CSL	Not disclosed	USA or EU	74	RBD	Not disclosed	V-PLEX SARS-CoV-2 10 plex panels 2 and 25 for IgG	N/A	ACE2 blocking assay rather than neutralisation	WH1, alpha, beta, delta, omicron (BA.1, BA.1.1, BA.2, BA.3, BA.1 with L452R)
							Octapharma	Not disclosed	USA or EU
							Takeda	Not disclosed	USA or EU
Upasani, V	2023	https://doi.org/10.1093/cid/ciad368	UK	All IVIg products tested contained neutralising antibodies to SARS-CoV-2 spike protein and was capable of neutralising ancestral and omicron variants. Furthermore, these antibodies were successfully transferred to patients where they retained their capacity to neutralise virus.	Post	IVIg	Flebogamma Gammaplex Intracect Iqymune Octagam Privigen	Grifols Kedrion Pharma Biotest LFB Biopharmaceuticals Octapharma CSL	not disclosed	30	N/A	N/A	Elecsys anti-SARS-CoV-2 immunoassays from Roche. SARS-CoV-2 Semi-Quantitative Spike Total quantitative IgG assays.	30/30	Luminescence-based pseudovirus neutralisation assay	Omicron BA.1, BA.4/5, BQ.1.1 and XBB
Raphael, A	2023	https://doi.org/10.3389/fimmu.2023.1156823	Israel	Study determining the levels of SARS-CoV-2 spike-specific IgG in IVIg products. 54/111 products were collected during the pandemic. 13 (24%) were negative for SARS-CoV-2 spike-specific IgG antibodies, with the remainder testing positive. Here a doubling of SARS-CoV-2 spike-specific antibody levels occurred from February 2021 to March 2021 in line with increased prevalence of COVID-19 in Israel. I…	Pre/Post	IVIg	Ig-vena Omr-IgG-am Flebogamma Gamunex Privigen Kiovig	Kedrion Pharma Omerix Grifols Genmedix Takeda	Europe, US and Israel	111	Spike	41/54 (75.9%)	Abbott AdviseDx SARS-CoV-2 IgG II assay	N/A	N/A	No

## Sheet: Table S5 Therapeutic mAbs
Lead author	Year published	DOI	Country	mAb	Other name	Brand	Route of administration	Dosage	Cohort	No. patients	Median time since symptom onset	BA.1 infected	BA.2 infected	BA.5 infected	BF.7 infected	Immunocompromised	Received > or equal to 3 vaccine doses	Primary Outcome	Secondary Outcome	Summary/Important Findings	Neutralizing capacity	Method: Neutralizing Capacity	Variants?
Martin-Blondel G.	2022	https://doi.org/10.1016/j.jinf.2022.06.033	Various	Sotrovimab	S309	GSK	IV	500mg	Omicron BA.1 and BA.2 infected patients with mild-to-moderate COVID-19	190	3 days (Q1-Q3 2-4days)	47/190 (25%)	143/190 (75%)	-	-	136/190 (72%)	143/190 (77%)	Proportion of patients with COVID-19 related hospitalization or death within 1 month of treatment initiation	Slope of change over time assessed by nasopharyngeal PCR	Comorbidities and anti-spike IgG equivalent between BA.1 and BA.2 infected individuals. At day 28 post Sotrovimab administration 3/25 (2.4%) BA.1 and 1/42 (2.4%) BA.2 infected patients were hospitalized due to COVID-19 induced disease. Slope did not differ. 86 patients required extended nasopharyngeal virological follow up due to persistent COVID-19 PCR positivity with 22% (15/68) BA.-infected de…	N/A	N/A	Yes. Omicron BA.1 and BA.2
Zaqout, A.	2022	https://doi.org/10.1016/j.ijid.2022.09.023	Qatar	Sotrovimab	S309	GSK	IV	500mg	Patients eligible for Sotrovimab therapy	519	-	-	233/340 (97.1%)	-	-	338/340 (99.4%)	145/240 (42.6%)	Proportion of patients with COVID-19 related hospitalization or death within 1 month of treatment initiation	-	Matched case control among individuals in Qatar that were eligible to receive Sotrovimab. Adjusted odds ratio for disease progression to severe/fatal disease (2.67). No evidence for a protective effect against Omicron BA.2. Note: 66 had a record of hospitalization in an acute or intensive care bed.	N/A	N/A	Yes. Omicron BA.2
Zheng, B	2022	https://doi.org/10.1136/bmj-2022-071932	UK	Sotrovimab	S309	GSK	IV	500mg	Adult patients at high risk of severe COVID-19	3331	-	-	-	-	-	Not disclosed	2945/3331 (88.4%)	Admission to hospital or death within 28 days of treatment commencement.	28 day admission or death and 60 day COVID-19 related hospitalization/death.	Community based treatment of COVID-19 in at risk groups using Sotrovimab or Molnupiravir. Those treated with Sotrovimab were at lower risk of severe COVID-19 disease than those with (No Suggestions) in cohort 1. Cohort 2 saw further reduced risk 28-day COVID-19 related hospitalization or death.	N/A	N/A	No.
Cheng, M.M.	2023	https://doi.org/10.1007/s40121-022-00755-0	USA/UK	Sotrovimab	S309	GSK	IV	500mg	Adult patients at high risk of severe COVID-19	15633	-	-	419/15633 (2.7%)	-	-	6525/15633 (41.7%)	3177/15633 (20.3%)	30d hospitalization or mortality	-	Retrospective analysis of patients at high risk of COVID-19 either treated with sotrovimab or untreated. Treatment was associated with reduced risk of 30-day hospitalization and mortality.	N/A	N/A	N/A
Harman, A.R.	2023	https://doi.org/10.1111/irv.13150	UK	Sotrovimab	S309	GSK	IV	500mg	Individuals aged 10 to >80 receiving sotrovimab in the community.	19149	-	4285/19149 (22.3%)	4565/19149 (23.8%)	-	-	Not disclosed	88/8850 (0.48%)	Hospital admission length of stay 2 or more days post infection.	-	Retrospective cohort study of community treatment of individuals with either Omicron BA1 or BA2 with sotrovimab. Risk of admission similar for each Omicron subvariant.	N/A	N/A	Yes. Omicron BA.1 and BA.2
Patel V	2022	https://doi.org/10.1101/2022.11.28.22282808	UK	Sotrovimab	S309	GSK	IV	500mg	Non-hospitalized >12 years old and expected to be at high risk of severe disease	696	-	-	-	-	-	-	-	Clinical outcomes 28d post COVID-19 diagnosis.	-	Retrospective study of patients receiving early treatment of COVID-19. 5/96 hospitalized with COVID-19.	N/A	N/A	No.
Zheng B	2022	https://doi.org/10.1101/2023.01.20.23284849	UK	Sotrovimab	S309	GSK	IV	500mg	Adult patients at high risk of severe COVID-19	2847	-	-	-	-	-	-	0.93	COVID-19 related hospitalisation or death within 28 days of treatment initiation.	-	Study assessing the clinical outcomes of patients treated with Paxlovid, sotrovimab or (No Suggestions) between February 11 2022 and October 1 2022. No substantial difference between those treated with Paxlovid and sotrovimab when infected with Omicron subvariants.	N/A	N/A	No.
Totschnig D	2022	https://doi.org/10.3390/v14102278	Austria/Germany	Sotrovimab	S309	GSK	IV	500mg	Immunocompromised individuals with inadequate vaccine responses	95	-	-	-	-	-	-	-	Breakthrough infections after PrEP.	-	Antibody levels in plasma remain high for at least 3 months post sotrovimab prophylaxis, higher than after Evusheld infusion. Breakthrough infections were rare (13/132, 10%) with a mild disease course.	N/A	N/A	No.
				Evusheld	AZD7442	AstraZeneca	IM	300mg each		37
Stiasny, K	2022	https://doi.org/10.3389/ti.2022.10906	Austria	Sotrovimab	VIR-7831/GSK4182136	GSK	IV	500mg	Kidney transplant recipients without neutralizing antibodies after at least 3 doses of COVID-19 vaccine	20	-	-	-	-	-	-	-	In vitro neutralization in serum of patients up to 8 weeks after PrEP.	-	In vitro neutralization of virus by serum of treated patients. All sotrovimab recipients retained neutralization capacity at 4 weeks post administration to BA1 and one still retained this capacity against BA1 at 8 weeks. For BA2 neutralization was at 60% at 4 weeks and 15% at 8 weeks. Patients receiving Evusheld had significantly higher neutralization towards BA2 than sotrovimab, for at least 8 w…	20/20 (100%) for BA.1 versus 12/20 (60%) towards BA.2	Not disclosed	Yes. Omicron BA.1 and BA.2
				Evusheld	AZD7442	AstraZeneca	IM	300mg each		30											Not disclosed
Animal Models
Case J.B.	2022	https://doi.org/10.1038/s41467-022-31615-7	USA/Japan	Sotrovimab	S309	GSK	IV	200ug (~10mg/kg)	K18-hACE2 mice	-	-	-	-	-	-	-	-	Prevention murine infection with SARS-CoV-2	-	Sotrovimab reduced omicron BA.2 viral RNA levels in lungs of infected mice (742-fold reduction). No evidence of protection in nasal turbinates or washouts in tese mice. Evusheld treatment reduced viral burden in these mice but protection from upper respiratory tract infection was less consistent in Omicron BA.1 but not BA.2.	N/A	N/A	No.
				Evusheld	AZD7442	AstraZeneca	IM	300mg each
Loo, Y.M.	2021	https://doi.org/10.1126/scitranslmed.abl8124	USA	Evusheld	AZD7442	AstraZeneca	IM	300mg each	Nonhuman primate model of SARS-CoV-2 infection	Not disclosed	-	-	-	-	-	-	-	Prophylactic administration: prevention of infection. Therapeutic dose: reduced viral load and clearance.	-	Prophylactic administration of Evusheld prevented infection and therapeutic infusion accelerated viral clearance in the lung. Antibody levels were 10x higher than in convalescent serum for at least 3 months post administration.	N/A	N/A	N/A
In vitro studies
Addetia	2023	https://doi.org/10.1101/2023.01.17.523798	USA/Switzerland/Australia	Sotrovimab	S309	GSK	N/A	N/A	-	N/A	-	-	-	-	-	-	-	Neutralization against Omicron variants.	-	Sotrovimab avidly binds all Omicron variants facilitating Fc-dependent effector function. Additionally, sotrovimab protects mice from BQ.1.1. infection. Sotrovimab exhibits reduced neutralization capacity to Omicron BA.2 (14.4) and XBB.a.5 (33.3) compared to WH-1.	Not disclosed	VSV pseudovirus neutralization	Yes. Omicron various including BQ.1.1
